# Supplementary material for: Diagnosis of Bovine Respiratory Disease in feedlot cattle using blood 1H NMR metabolomics
Source: PubMed Central journal article supplement (PMC6954258; doi:10.1038/s41598-019-56809-w), 2020-01-10

***Diagnosis of Bovine Respiratory Disease in feedlot cattle using blood <sup>1</sup>H NMR metabolomics***

*C. Blakebrough-Hall*<sup>1\*</sup>, *A. Dona*<sup>2</sup>, *M.J. D'occhio*<sup>1</sup>, *J. McMeniman*<sup>3</sup> and *L.A González*<sup>1,4</sup>

<sup>1</sup>School of Life and Environmental Sciences, Faculty of Science, University of Sydney, Camden, 2570, NSW, Australia

<sup>2</sup>Kolling Institute of Medical Research, Faculty of Medicine and Health, University of Sydney, St Leonards, 2065, NSW, Australia

<sup>3</sup>Meat and Livestock Australia, Brisbane, 4006, QLD, Australia

<sup>4</sup>Sydney Institute of Agriculture, University of Sydney, Biomedical Building, Australian Technology Park, 2015, NSW, Australia

## Supplementary Information

Supplementary Figure 1. Full spectra before water peak (4.30 to 5.10 ppm) and DSS (4,4-dimethyl-4-silapentane-1-sulfonic acid; -1.00 to 0.52 ppm) truncation. DSS is used for calibration of the NMR.

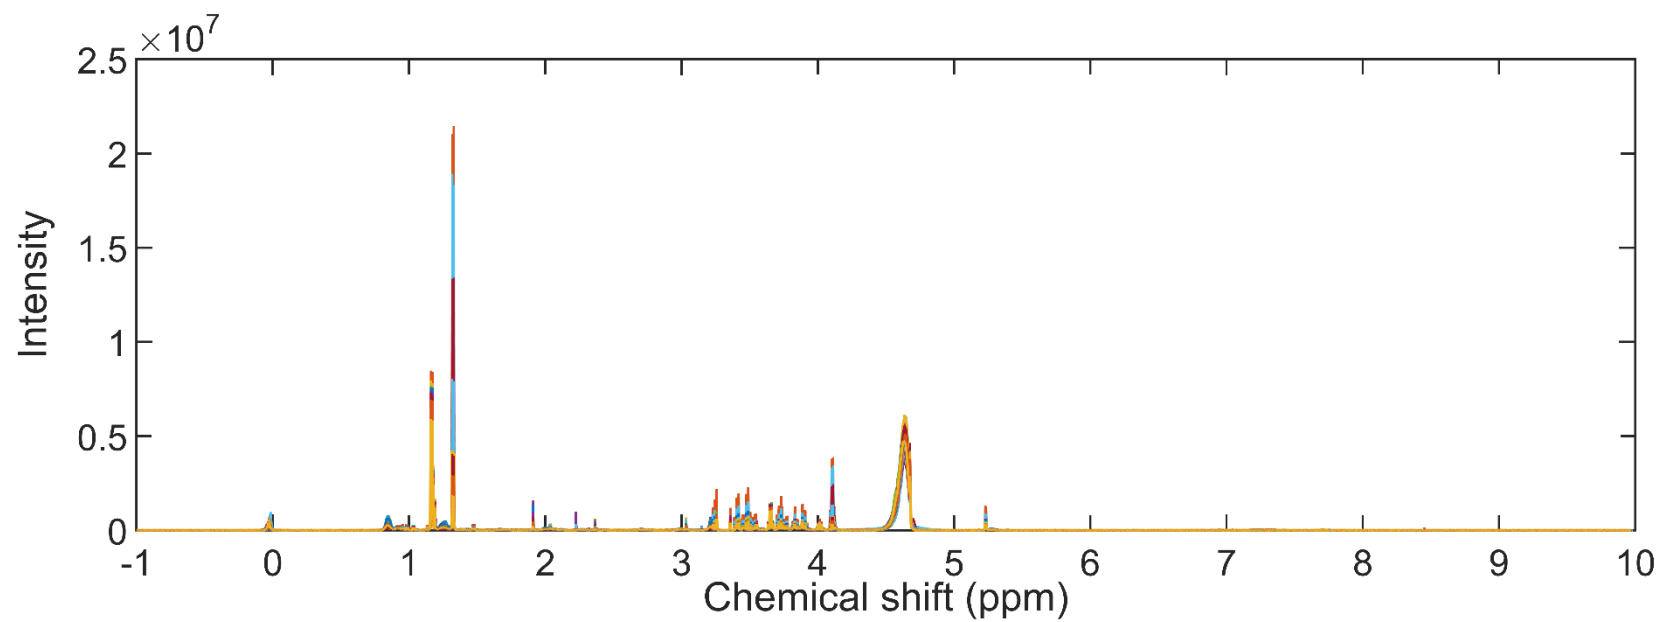

Supplementary Figure 2. Full spectra after water peak (4.30 to 5.10 ppm) and DSS (-1.00 to 0.52 ppm) truncation.

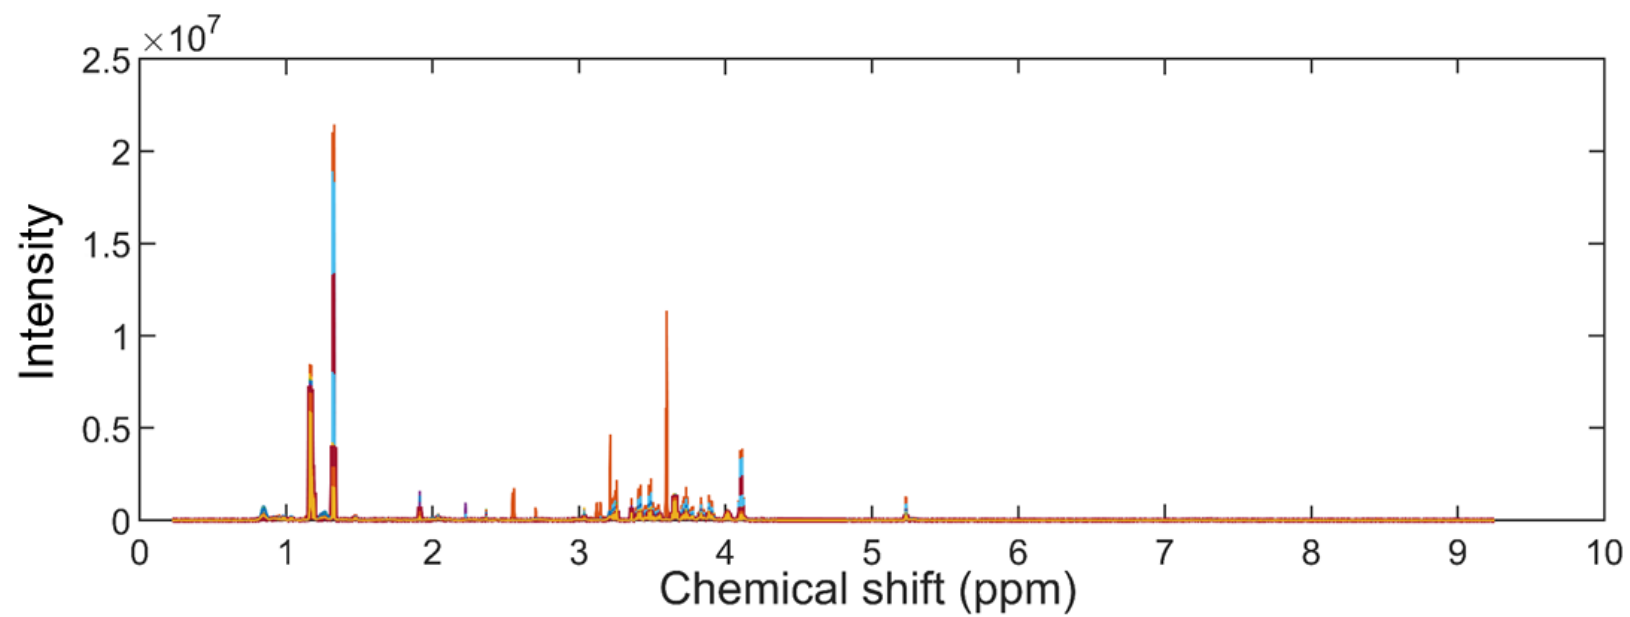

Supplement: 41598_2019_56809_MOESM1_ESM.pdf [file 41598_2019_56809_MOESM1_ESM.pdf]
